# Supplementary material
Source: PubMed Central journal article supplement (PMC3257857)
Supplement: NIHMS344928-supplement-03.pdf [file NIHMS344928-supplement-03.pdf]

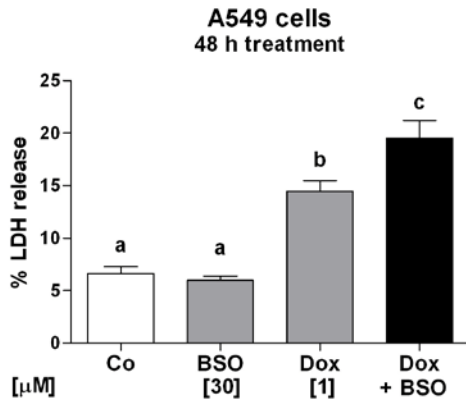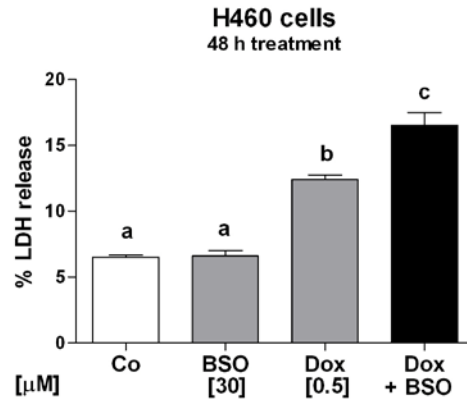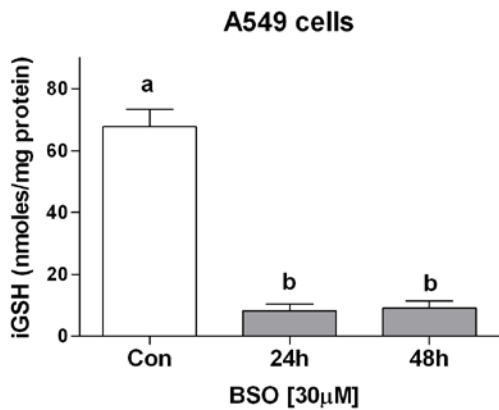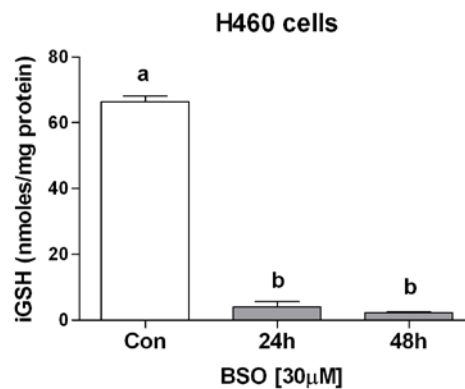

Supplemental Figure. Co-treatment of resistant A549 and sensitive H460 cells with BSO and DOX results in significant sensitization of cells to DOX as compared to DOX treatment alone. BSO treatment depleted intracellular GSH (iGSH) levels at both 24 and 48 hours. Data are presented as the mean  $\pm$  S.E.M. and columns with different letters are significantly different ( $p < 0.05$ ) as determined using ANOVA with the Tukey post test comparison ( $n=3$ ).
